# Supplementary material for: Prevalence of Syphilis among Pregnant Women in Sub-Saharan Africa: A Systematic Review and Meta-Analysis
Source: Hindawi journal article supplement (doi:10.1155/2019/4562385), 2019-07-16
Supplement: f1 [file 4562385.f1.zip]

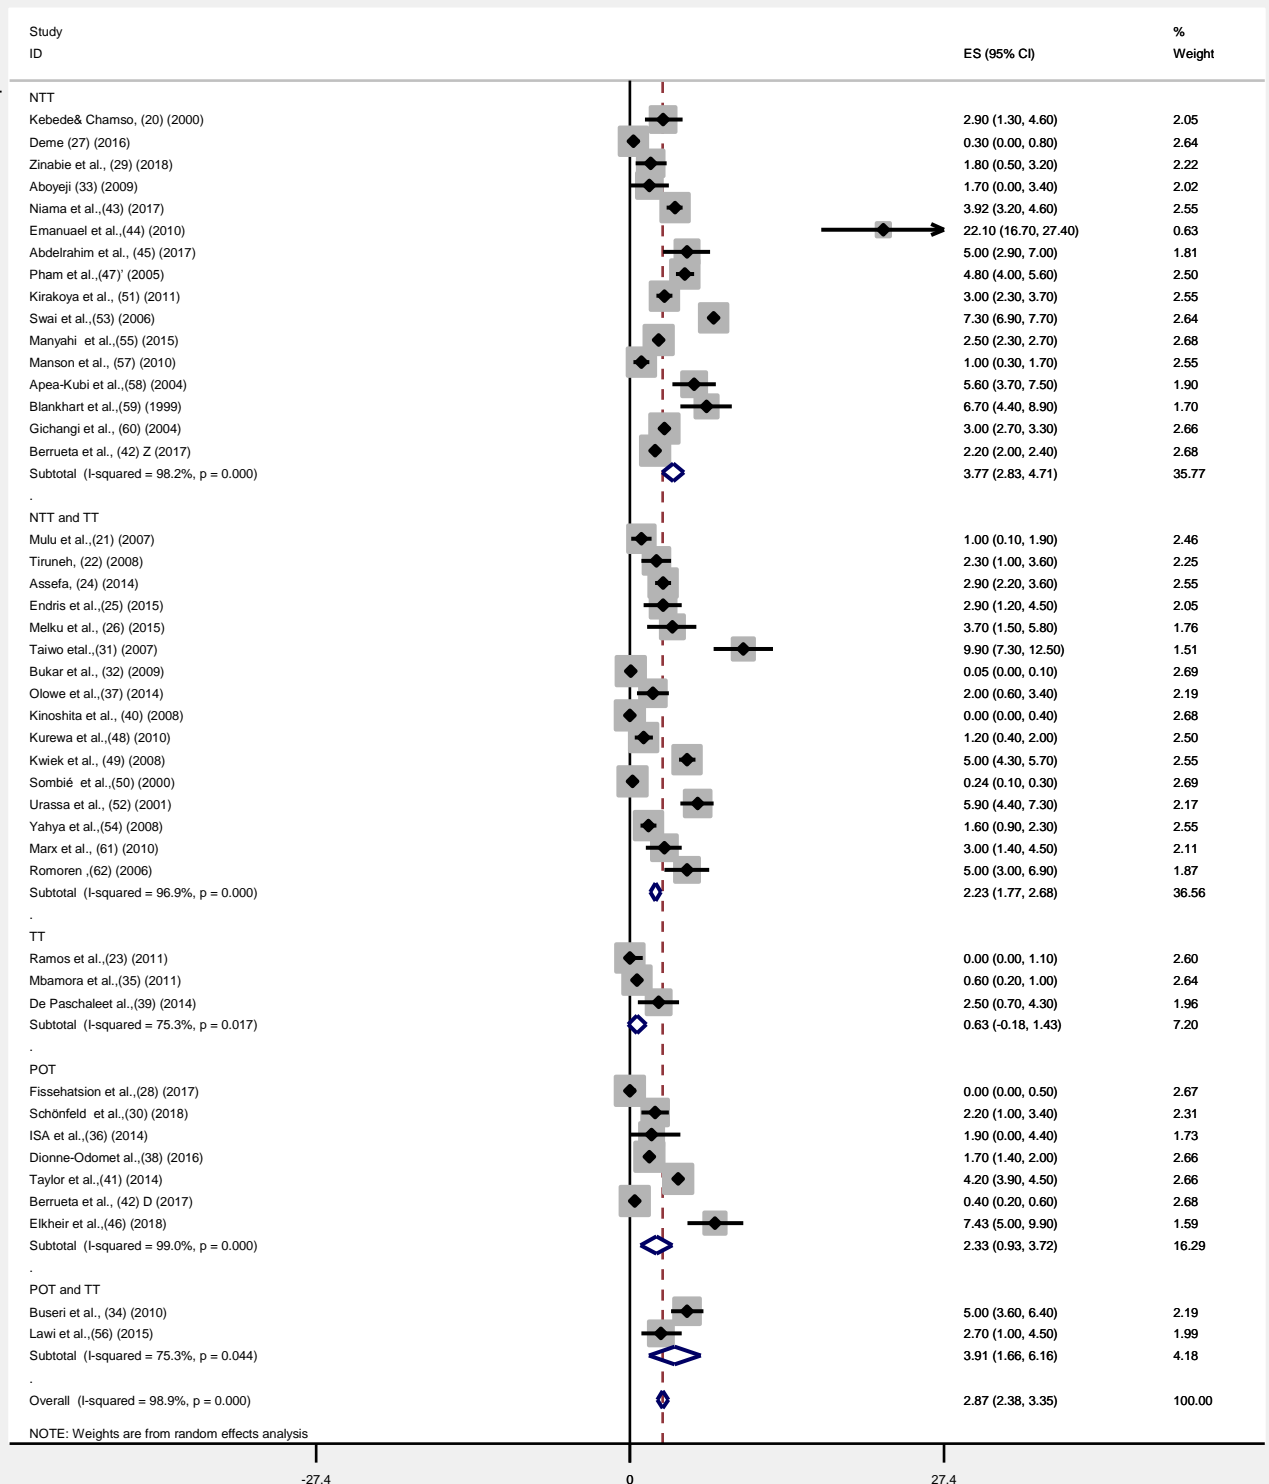

Figure S3: The sub group meta-analysis laboratory diagnostic test and forest plot presentation of Syphilis prevalence from 1999 to 2018.
